# Supplementary material
Source: publisher figshare collection journal article supplement (https://gsapubs.figshare.com/ndownloader/files/22743434)
Supplement: Supplementary file 1 [file 22743434]

**Supplementary data for: Pleistocene glass in the Australian desert: The case for an impact origin,  
by P. W. Haines, R. J. F. Jenkins and S. P. Kelley**

**Appendix Table A:** Orientation of planar microstructures in quartz within clasts in Edeowie glass, measured as the angle between the pole to the set and the c-axis. Total data set comprising 95 sets in 61 grains. Measurements were carried out on thin sections using a universal stage attached to a petrological microscope. Set orientations are tabulated in 5 degree bins and have not been uniquely indexed. All measurements done at School of Earth Sciences, University of Tasmania.

| Polar angle<br>with c-axis | No. of sets | Percentage |
|----------------------------|-------------|------------|
| 0-4.9°                     | 2           | 2.1%       |
| 5-9.9°                     | 0           | 0.0%       |
| 10-14.9°                   | 0           | 0.0%       |
| 15-19.9°                   | 1           | 1.1%       |
| 20-24.9°                   | 21          | 22.1%      |
| 25-29.9°                   | 6           | 6.3%       |
| 30-34.9°                   | 23          | 24.2%      |
| 35-39.9°                   | 4           | 4.2%       |
| 40-44.9°                   | 3           | 3.2%       |
| 45-49.9°                   | 7           | 7.4%       |
| 50-54.9°                   | 6           | 6.3%       |
| 55-59.9°                   | 2           | 2.1%       |
| 60-64.9°                   | 2           | 2.1%       |
| 65-69.9°                   | 6           | 6.3%       |
| 70-74.9°                   | 4           | 4.2%       |
| 75-79.9°                   | 1           | 1.1%       |
| 80-84.9°                   | 3           | 3.2%       |
| 85-90°                     | 4           | 4.2%       |
| Total                      | 95          | 100.0%     |

**Appendix Table B:** Number of measured planar microstructure sets per grain versus number of grains. Multiple sets were commonly only evident after tilting on universal stage.

| Sets per grain | No. of grains | Percentage |
|----------------|---------------|------------|
| 1              | 32            | 52.5%      |
| 2              | 24            | 39.3%      |
| 3              | 5             | 8.2%       |
| Total          | 61            | 100.0%     |

**Appendix Table C:** Indexed planar microstructure sets restricted to 63 sets in 29 multi-set grains. Indexing was carried out using stereonet plots and a template following methods detailed in Engelhardt and Bertsch (1969) and Stöffler and Langenhorst (1994). Template allows for 5° error in measurement.

| Symbol    | Miller-Bravais<br>index           | Polar angle<br>with c-axis | No. of<br>sets | Percentage |
|-----------|-----------------------------------|----------------------------|----------------|------------|
| c         | (0001)                            | 0.00°                      | 2              | 3.2%       |
| ω         | {10 $\bar{1}$ 3}                  | 23.95°                     | 16             | 25.4%      |
| π         | {10 $\bar{1}$ 2}                  | 32.42°                     | 14             | 22.2%      |
| ξ         | {11 $\bar{1}$ 2}                  | 47.73°                     | 9              | 14.3%      |
| r,z       | {10 $\bar{1}$ 1},{01 $\bar{1}$ 1} | 51.79°                     | 3              | 4.8%       |
| s         | {11 $\bar{2}$ 1}                  | 65.56°                     | 4              | 6.3%       |
| ρ         | {21 $\bar{3}$ 1}                  | 73.71°                     | 3              | 4.8%       |
| χ         | {51 $\bar{6}$ 1}                  | 82.07°                     | 2              | 3.2%       |
| m,a       | {10 $\bar{1}$ 0},{11 $\bar{2}$ 0} | 90.00°                     | 2              | 3.2%       |
| Unindexed |                                   |                            | 8              | 12.7%      |
| Total     |                                   |                            | 63             | 100.0%     |

Combined measurements from grains within separate sandstone or quartzite clasts and from isolated quartz grains in several separate samples, so overall distribution pattern cannot be used to imply specific shock pressures.

**Appendix Table D:**  $^{40}\text{Ar}/^{39}\text{Ar}$  analytical data. Analytical procedures are detailed in Kelley (1995). The samples were over irradiated leading to low  $^{40}\text{Ar}/^{39}\text{Ar}$  ratios but the irradiation corrections were constrained by analysis of salts and samples were Cd shielded, leading to a  $(^{40}\text{Ar}/^{39}\text{Ar})_{\text{K}}$  correction factor of 0.0087. The J value for the three samples was measured using the international standard GA1550 (Renne et al., 1998). Two samples of PG4 contained lithic fragments yielding older ages, and one contained very little potassium, yielding an age with high errors; these were excluded from the final mean age but are shown here for completeness.

**TLD1:** Australasian tektite from Thailand (analyzed for comparison).

**PG4:** Slab-type glass from southern locality.

**VG1:** Highly vesicular (scoriaceous) melt from northern locality.

| Sample<br>Analysis no. | $^{40}\text{Ar}/^{39}\text{Ar}$ | $^{38}\text{Ar}/^{39}\text{Ar}$ | $^{37}\text{Ar}/^{39}\text{Ar}$ | $^{36}\text{Ar}/^{39}\text{Ar}$ | $^{39}\text{Ar}$<br>( $10^{-12}$ cc STP) | %<br>atmos | $^{40}\text{Ar}^*/^{39}\text{Ar}$ | Age<br>(Ma)      | $\pm$<br>( $1\sigma$ ) | comment       |
|------------------------|---------------------------------|---------------------------------|---------------------------------|---------------------------------|------------------------------------------|------------|-----------------------------------|------------------|------------------------|---------------|
| <b>TLD1</b>            |                                 |                                 |                                 |                                 |                                          |            |                                   |                  |                        |               |
| uncrushed              |                                 |                                 |                                 |                                 |                                          |            |                                   |                  |                        |               |
| 1                      | 0.046                           | 0.0135                          | 0.0903                          | 2.9771E-05                      | 0.59                                     | 19.1       | 0.046                             | 0.98             | 1.97                   |               |
| 2                      | 0.071                           | 0.0124                          | 0.1533                          | 0                               | 0.70                                     | 0.0        | 0.071                             | 1.51             | 1.32                   |               |
| 3                      | 0.057                           | 0.0135                          | 0.1462                          | 1.3480E-05                      | 0.63                                     | 7.0        | 0.057                             | 1.20             | 1.60                   |               |
| 4                      | 0.028                           | 0.0127                          | 0.1417                          | 0                               | 1.61                                     | 0.0        | 0.028                             | 0.59             | 0.30                   |               |
| 5                      | 0.024                           | 0.0132                          | 0.1549                          | 0                               | 1.47                                     | 0.0        | 0.024                             | 0.52             | 0.53                   |               |
| 6                      | 0.038                           | 0.0123                          | 0.1095                          | 7.4191E-06                      | 1.32                                     | 5.8        | 0.038                             | 0.80             | 0.55                   |               |
| 7                      | 0.020                           | 0.0126                          | 0.1216                          | 4.3851E-06                      | 1.57                                     | 6.3        | 0.020                             | 0.43             | 0.30                   |               |
| 8                      | 0.033                           | 0.0122                          | 0.2432                          | 0                               | 1.33                                     | 0.0        | 0.033                             | 0.70             | 0.54                   |               |
| 9                      | 0.030                           | 0.0125                          | 0.2474                          | 4.1107E-06                      | 1.66                                     | 4.1        | 0.030                             | 0.62             | 0.44                   |               |
| 10                     | 0.026                           | 0.0131                          | 0.2237                          | 6.1542E-06                      | 1.52                                     | 7.0        | 0.026                             | 0.55             | 0.51                   |               |
| 11                     | 0.026                           | 0.0128                          | 0.2478                          | 3.0768E-06                      | 1.92                                     | 3.5        | 0.026                             | 0.55             | 0.39                   |               |
| 12                     | 0.064                           | 0.0123                          | 0.2103                          | 0                               | 1.26                                     | 0.0        | 0.064                             | 1.35             | 0.57                   |               |
| 13                     | 0.029                           | 0.0119                          | 0.2174                          | 6.3020E-06                      | 1.11                                     | 6.4        | 0.029                             | 0.61             | 0.63                   |               |
| 14                     | 0.065                           | 0.0124                          | 0.2153                          | 1.8687E-06                      | 1.39                                     | 0.9        | 0.065                             | 1.37             | 0.33                   |               |
|                        |                                 |                                 |                                 |                                 | mean<br>4.3                              |            |                                   | mean age<br>0.73 | 0.24                   | (2 $\sigma$ ) |
| <b>PG4 uncrushed</b>   |                                 |                                 |                                 |                                 |                                          |            |                                   |                  |                        |               |
| 1                      | 14.691                          | 0.0235                          | 0.6012                          | 0.0499                          | 0.74                                     | 100.4      | N/A                               | N/A              | 3.24                   |               |
| 2                      | 13.226                          | 0.0209                          | 0.1767                          | 0.0450                          | 1.21                                     | 100.2      | N/A                               | N/A              | 1.84                   |               |
| 3                      | 6.867                           | 0.0183                          | 1.0077                          | 0.0230                          | 1.18                                     | 99.0       | 0.067                             | 1.41             | 2.15                   |               |
| 4                      | 10.901                          | 0.0193                          | 0.2232                          | 0.0360                          | 1.27                                     | 97.6       | 0.257                             | 5.44             | 1.50                   |               |
| 5                      | 21.142                          | 0.0263                          | 0.1633                          | 0.0716                          | 1.26                                     | 100.1      | N/A                               | N/A              | 4.56                   |               |
|                        |                                 |                                 |                                 |                                 | mean<br>99.6                             |            |                                   | no mean<br>age   |                        |               |
| <b>PG4 crushed</b>     |                                 |                                 |                                 |                                 |                                          |            |                                   |                  |                        |               |
| 1                      | 0.729                           | 0.0133                          | 0.2341                          | 0.0023                          | 588                                      | 94.7       | 0.039                             | 0.82             | 0.10                   |               |
| 2                      | 0.472                           | 0.0122                          | 0.2026                          | 0.0016                          | 98                                       | 98.4       | 0.007                             | 0.16             | 0.38                   | excluded      |
| 3                      | 0.490                           | 0.0128                          | 0.2602                          | 0.0011                          | 800                                      | 63.5       | 0.179                             | 3.78             | 0.11                   | excluded      |
| 4                      | 0.338                           | 0.0125                          | 0.3041                          | 0.0010                          | 1146                                     | 90.4       | 0.032                             | 0.69             | 0.05                   |               |
| 5                      | 0.492                           | 0.0130                          | 0.2833                          | 0.0013                          | 1275                                     | 78.4       | 0.107                             | 2.25             | 0.03                   | excluded      |
| 6                      | 0.337                           | 0.0124                          | 0.1478                          | 0.0010                          | 886                                      | 91.1       | 0.030                             | 0.64             | 0.09                   |               |
| 7                      | 0.399                           | 0.0129                          | 0.2119                          | 0.0012                          | 680                                      | 89.4       | 0.042                             | 0.90             | 0.12                   |               |
| 8                      | 0.300                           | 0.0128                          | 0.2067                          | 0.0009                          | 1590                                     | 89.8       | 0.031                             | 0.65             | 0.02                   |               |
|                        |                                 |                                 |                                 |                                 | mean<br>91.1                             |            |                                   | mean age<br>0.67 | 0.07                   | (2 $\sigma$ ) |

**Appendix Table D continued:**  $^{40}\text{Ar}/^{39}\text{Ar}$  analytical data.

| Sample<br>Analysis no. | $^{40}\text{Ar}/^{39}\text{Ar}$ | $^{38}\text{Ar}/^{39}\text{Ar}$ | $^{37}\text{Ar}/^{39}\text{Ar}$ | $^{36}\text{Ar}/^{39}\text{Ar}$ | $^{39}\text{Ar}$<br>( $10^{-12}$ cc STP) | %<br>atmos   | $^{40}\text{Ar}^*/^{39}\text{Ar}$ | Age<br>(Ma)      | $\pm$<br>( $2\sigma$ ) | comments      |
|------------------------|---------------------------------|---------------------------------|---------------------------------|---------------------------------|------------------------------------------|--------------|-----------------------------------|------------------|------------------------|---------------|
| VG1 uncrushed          |                                 |                                 |                                 |                                 |                                          |              |                                   |                  |                        |               |
| 1                      | 49.908                          | 0.0466                          | 0.0915                          | 0.1680                          | 1.8                                      | 99.5         | 0.250                             | 5.27             | 2.93                   |               |
| 2                      | 14.039                          | 0.0240                          | 0.0433                          | 0.0474                          | 1.3                                      | 99.8         | 0.030                             | 0.64             | 1.83                   |               |
| 3                      | 63.152                          | 0.0545                          | 0.0256                          | 0.2137                          | 2.0                                      | 100          | -0.011                            | -0.24            | 12.11                  |               |
|                        |                                 |                                 |                                 |                                 |                                          | mean<br>99.8 |                                   | no mean<br>age   |                        |               |
| VG1 crushed            |                                 |                                 |                                 |                                 |                                          |              |                                   |                  |                        |               |
| 1                      | 0.767                           | 0.0133                          | 0.0743                          | 0.0024                          | 44.6                                     | 94.3         | 0.044                             | 0.92             | 0.83                   |               |
| 2                      | 0.195                           | 0.0126                          | 0.0490                          | 0.0006                          | 80.1                                     | 87.5         | 0.024                             | 0.51             | 0.73                   |               |
| 3                      | 0.242                           | 0.0131                          | 0.0428                          | 0.0006                          | 59.4                                     | 77.8         | 0.054                             | 1.14             | 0.99                   |               |
| 4                      | 0.128                           | 0.0142                          | 0.0276                          | 0.0002                          | 55.2                                     | 52.9         | 0.060                             | 1.27             | 1.06                   |               |
| 5                      | 0.111                           | 0.0129                          | 0.0393                          | 0.0002                          | 110.9                                    | 60.3         | 0.044                             | 0.93             | 0.34                   |               |
| 6                      | 0.426                           | 0.0146                          | 0.0518                          | 0.0012                          | 31.4                                     | 83.6         | 0.070                             | 1.48             | 1.18                   |               |
| 7                      | 0.276                           | 0.0129                          | 0.0249                          | 0.0007                          | 52.1                                     | 77.7         | 0.062                             | 1.30             | 0.71                   |               |
| 8                      | 0.082                           | 0.0121                          | 0.0271                          | 0.0001                          | 61.6                                     | 49.1         | 0.042                             | 0.89             | 0.60                   |               |
| 9                      | 0.159                           | 0.0124                          | 0.0231                          | 0.0005                          | 64.0                                     | 85.4         | 0.023                             | 0.49             | 0.59                   |               |
| 10                     | 0.087                           | 0.0133                          | 0.0274                          | 0.0001                          | 79.2                                     | 36.0         | 0.056                             | 1.18             | 0.47                   |               |
| 11                     | 0.101                           | 0.0124                          | 0.0194                          | 0.0003                          | 110.6                                    | 88.9         | 0.011                             | 0.24             | 0.34                   |               |
|                        |                                 |                                 |                                 |                                 |                                          | mean<br>72.1 |                                   | mean age<br>0.78 | 0.33                   | ( $2\sigma$ ) |

**X-Ray Fluorescence Analysis**

Undertaken at the School of Earth Sciences, University of Tasmania.

**Instrument** Philips PW1480 X-Ray Spectrometer

**X-Ray Tubes:** 3kW max. ScMo anode side window.

Elements analyzed: Majors, S, Y, Rb, U, Th, Cu, Pb, Zn, Ni, Co, Ga

3kW max. Au anode side window.

Elements analyzed: Nb, Zr, Sr, Ba, Cr, V, Sc, La, Ce, Nd

**Crystals:** LiF 200, LiF 220, PX-1 (for Na and Mg), PE002, Ge111

**Collimators:** Coarse (0.7 mm) and fine (0.3 mm) with auxiliary (0.14 mm)

**Detectors:** Gas flow proportional counter with P10 gas (10% methane in Ar) and Scintillation Counter.

**Sample Changer:** Philips 30 position sample holder.

**Sample Preparation:** All samples ground in an agate swing mill.

**Major Elements:** Fusion discs prepared at 1100°C in 5% Au/95%Pt crucibles. 0.77g sample, 4.125g Norrish Flux (Lithium borates/La<sub>2</sub>O<sub>3</sub> mix), 0.055g LiNO<sub>3</sub> for silicates. Platinum/gold moulds used for cooling.

**Trace Elements:** Pressed powder pills (3.5 tonnes/cm<sup>2</sup>) with 10 grams sample. Binder: PVP-MC.

**Corrections:** Corrections for mass absorption were calculated using Philips X40 software with De Jongh's calibration model and Philips (or CSIRO) alpha coefficients. Compton scattering also used for many trace elements.

**Calibration and blanks:** Pure element oxide mixes in pure silica, international and Tasmanian standard rocks, and pure silica blanks were run during analysis.

**References**

- Engelhardt, W. v., and Bertsch, W., 1969, Shock induced planar deformation structures in quartz from Ries crater, Germany: Contributions to Mineralogy and Petrology, v. 20, p. 203-234.
- Kelley, S.P., 1995, The Laser Microprobe Ar-Ar technique of Dating, in Potts, P.J., Bowles J.F.W., Reed S.J.B., and Cave, M.R., eds., Microprobe techniques in the Earth Sciences:, Cambridge, Chapman and Hall, 235 pp.
- Renne, P.R., Swisher, C.C., Deino, A.L., Kamer, D.B., Owens, T.L., and DePaulo, D.J., 1998, Intercalibration of standards, absolute ages and uncertainties in  $^{40}\text{Ar}/^{39}\text{Ar}$  dating: Chemical Geology, v. 145, p. 117-152.
- Stöffler, D., and Langenhorst, F., 1994, Shock metamorphism of quartz in nature and experiment: I. Basic observation and theory: Meteoritics, v. 29, p. 155-181.
